# Supplementary material for: Functionalization of 3D-Printed Titanium Scaffolds with Elastin-like Recombinamers to Improve Cell Colonization and Osteoinduction
Source: MDPI journal article supplement (doi:10.3390/pharmaceutics15030872), 2023-03-08
Supplement: s1 [file s1]

## **Supporting Information**

# **Functionalization of 3D-printed titanium scaffolds with elastin-like recombinamers to improve cell colonization and osteoinduction**

**Jordi Guillem-Marti\*, Elia Vidal, Alessandra Girotti, Aina Heras-Parets, Diego Torres, Francisco Javier Arias, Maria-Pau Ginebra, Jose Carlos Rodriguez-Cabello\*, Jose Maria Manero.**

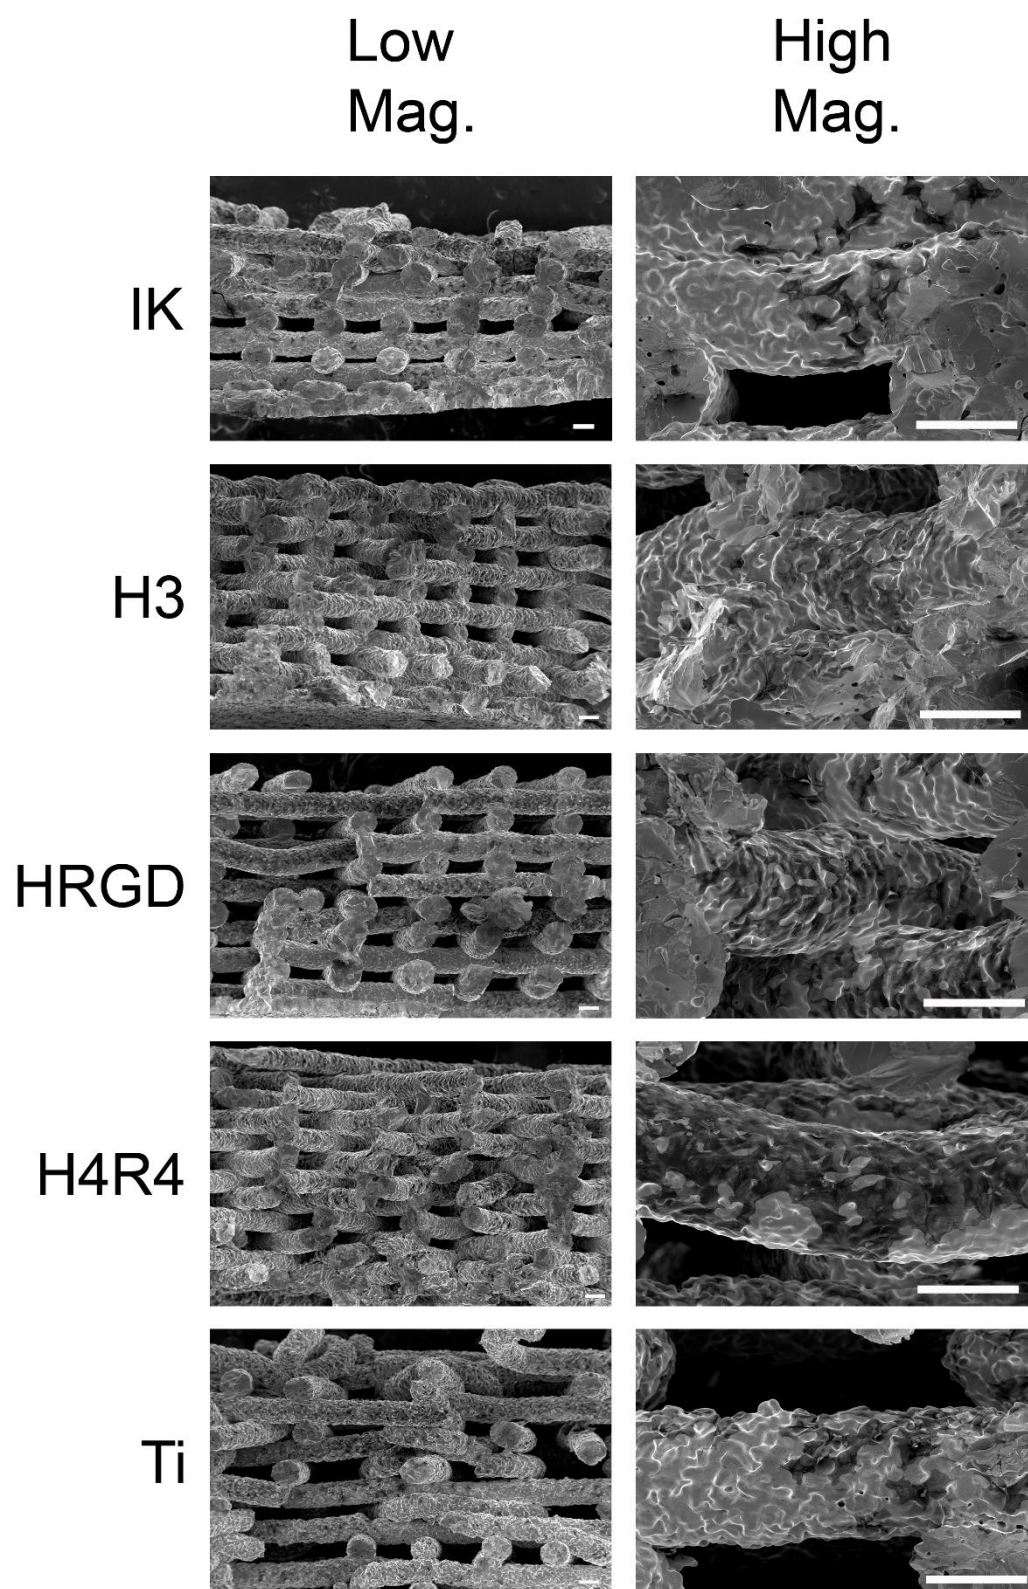

**Figure S1.** Low- and high-magnification SEM images of the different functionalized and non-functionalized Ti scaffolds showing attached cells 4 h after cell seeding. Scale bars denote 200  $\mu\text{m}$ .

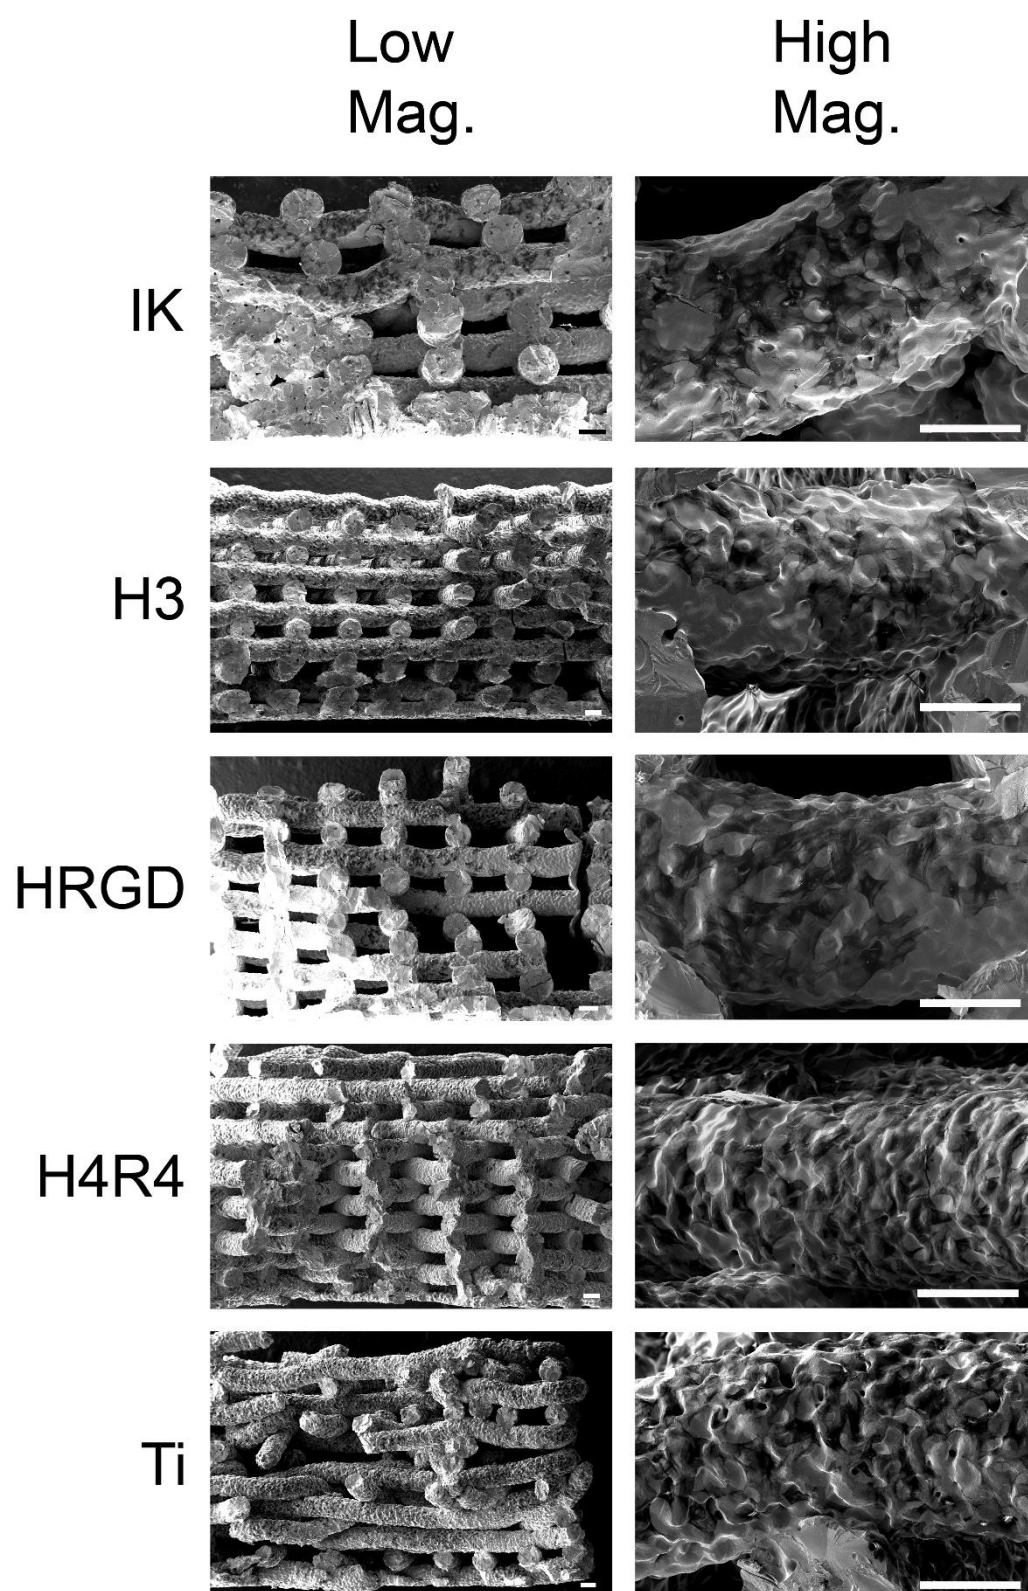

**Figure S2.** Low- and high-magnification SEM images of the different functionalized and non-functionalized Ti scaffolds showing attached cells after 7 days of culture. Scale bars denote 200  $\mu\text{m}$ .



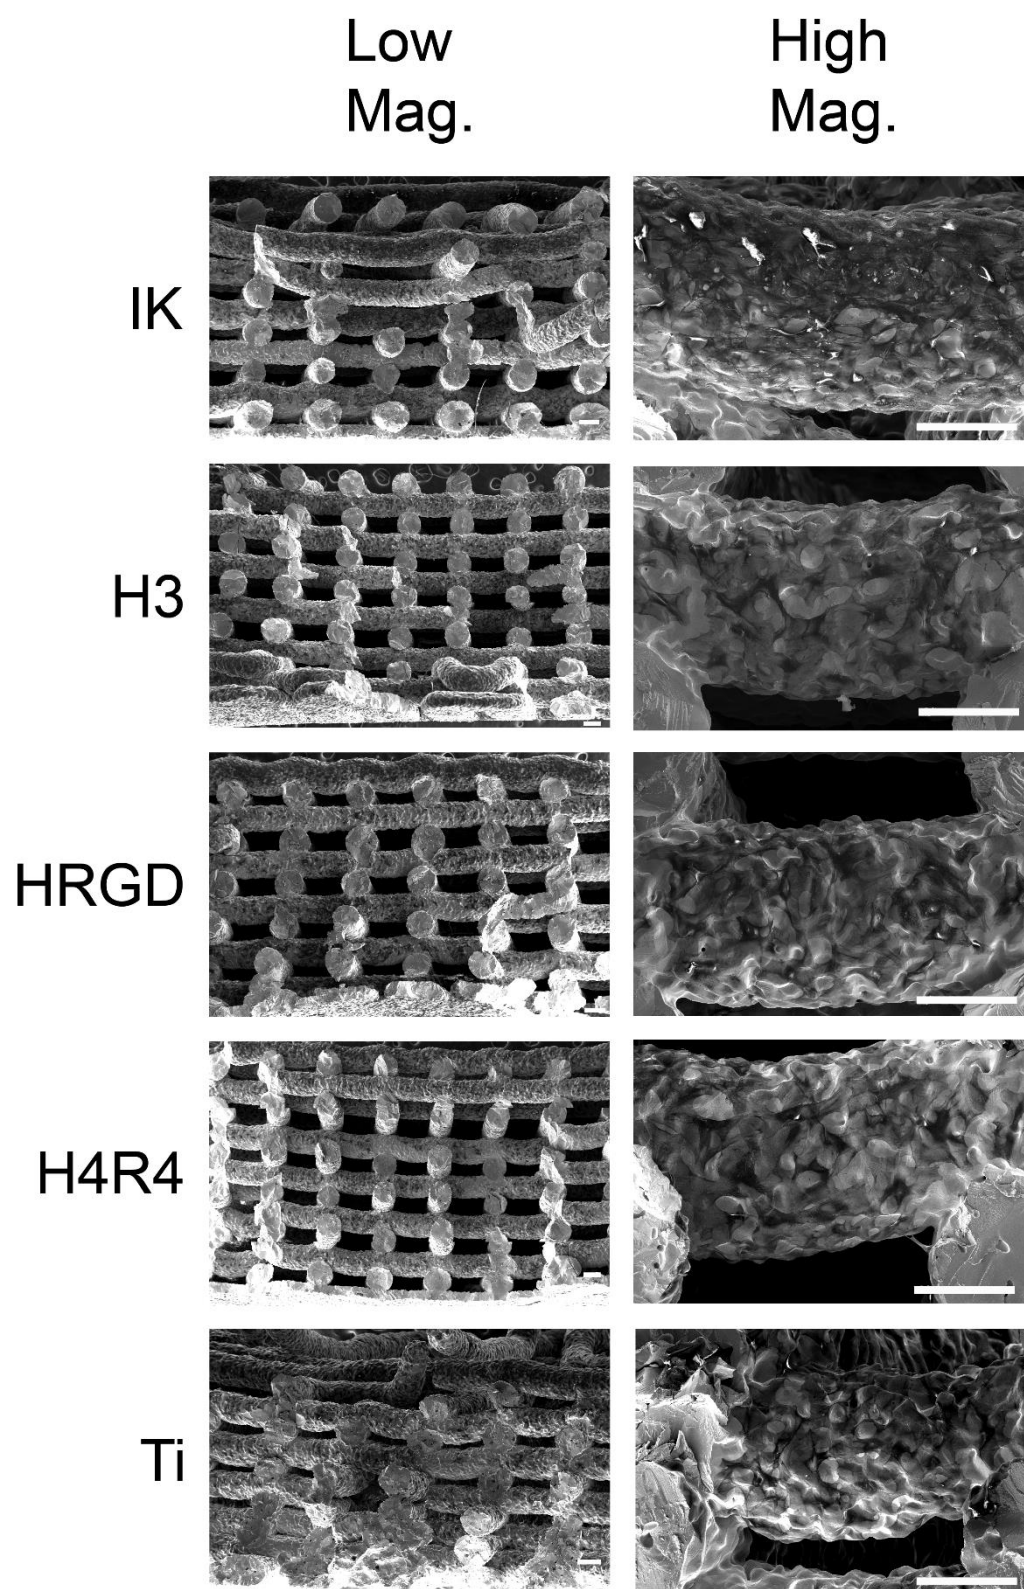

**Figure S3.** Low- and high-magnification SEM images of the different functionalized and non-functionalized Ti scaffolds showing attached cells after 14 days of culture. Scale bars denote 200  $\mu\text{m}$ .

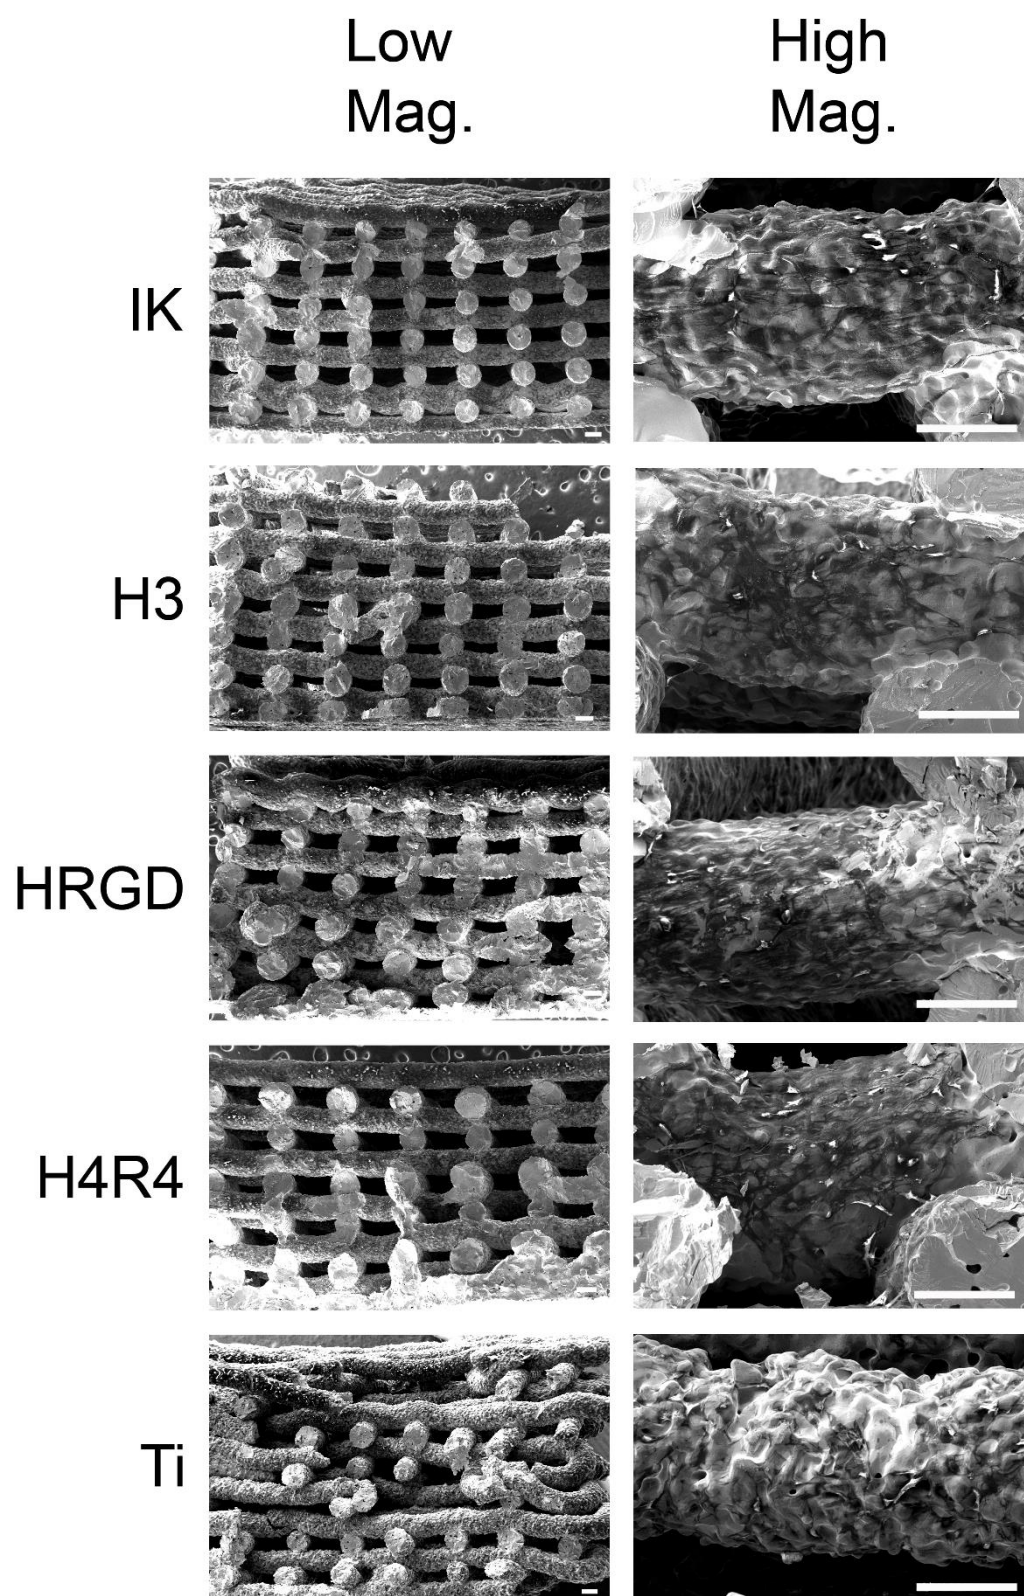

**Figure S4.** Low- and high-magnification SEM images of the different functionalized and non-functionalized Ti scaffolds showing attached cells after 21 days of culture. Scale bars denote 200  $\mu\text{m}$ .



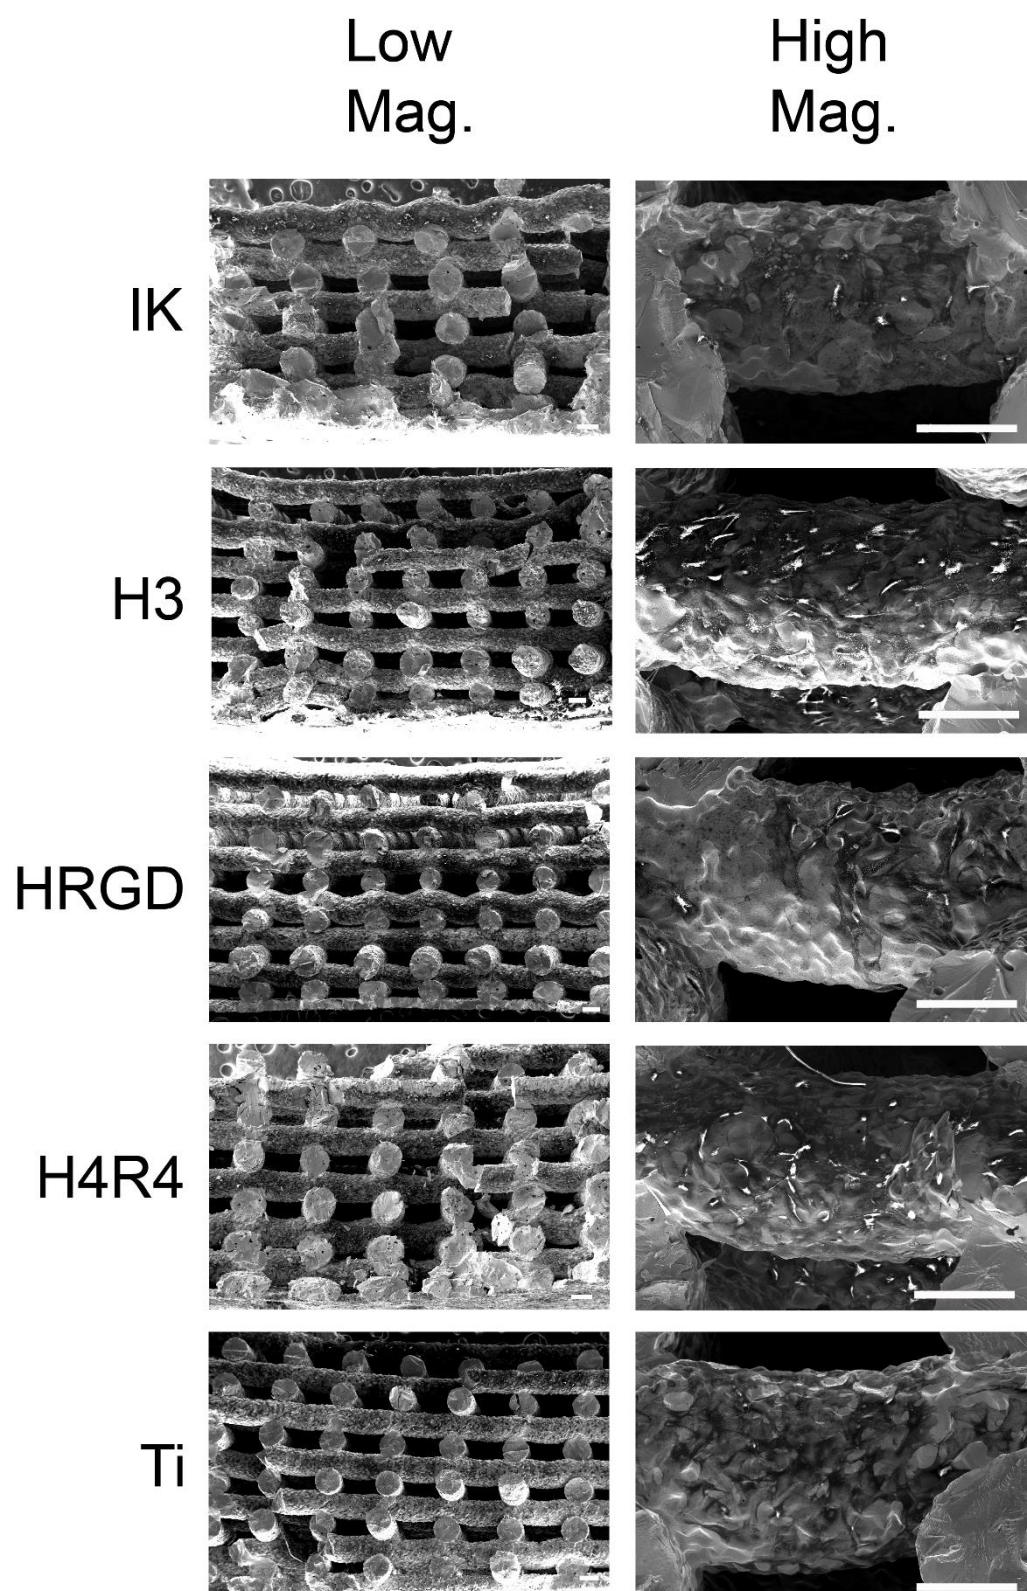

**Figure S5.** Low- and high-magnification SEM images of the different functionalized and non-functionalized Ti scaffolds showing attached cells after 28 days of culture. Scale bars denote 200  $\mu\text{m}$ .
